# Supplementary material for: Metathesis polymerization of monomers containing two diphenylacetylene units: synthesis and properties of poly(diphenylacetylene)s bearing diphenylacetylene units on the side chain
Source: Royal Society of Chemistry journal article supplement (doi:10.1039/d0py01182g), 2020-01-01
Supplement: d0py01182g1.pdf [file d0py01182g1.pdf]

Electronic supplementary material (ESI) for Polymer Chemistry

## Metathesis polymerization of monomers containing two diphenylacetylene units: Synthesis and properties of poly(diphenylacetylene)s bearing diphenylacetylene units on the side chain

Toshikazu Sakaguchi,\* Hikaru Shimada and Tamotsu Hashimoto

**Figure S1.** GPC chromatogram for **2a** (Table 2,  $M_w = 285,000$ ).

**Figure S2.** GPC chromatogram for **2b** (Table 1,  $M_w = 499,000$ ).

**Figure S3.** GPC chromatogram for **2c** (Table 1,  $M_w = 707,000$ ).

**Figure S4.** Raman spectrum for **2a**.

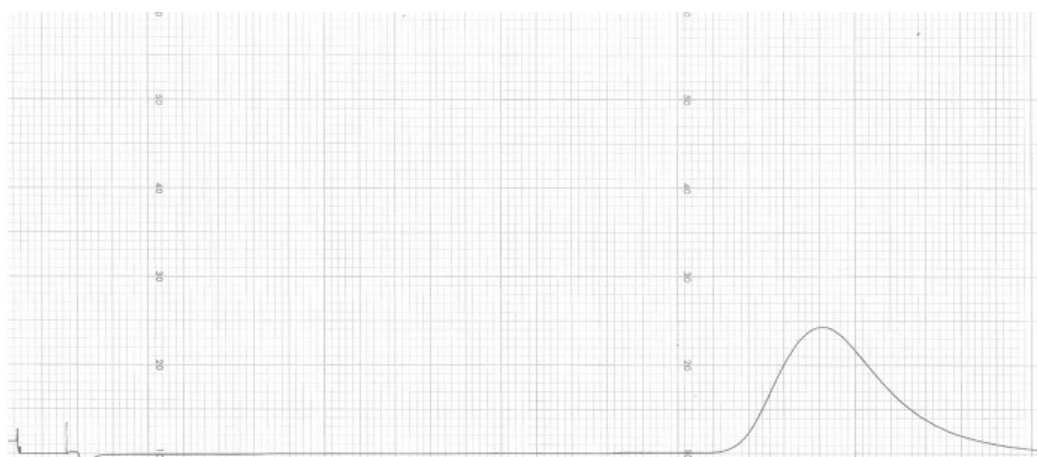

**Figure S1.** GPC chromatogram for **2a** (Table 2,  $M_w = 285,000$ ).

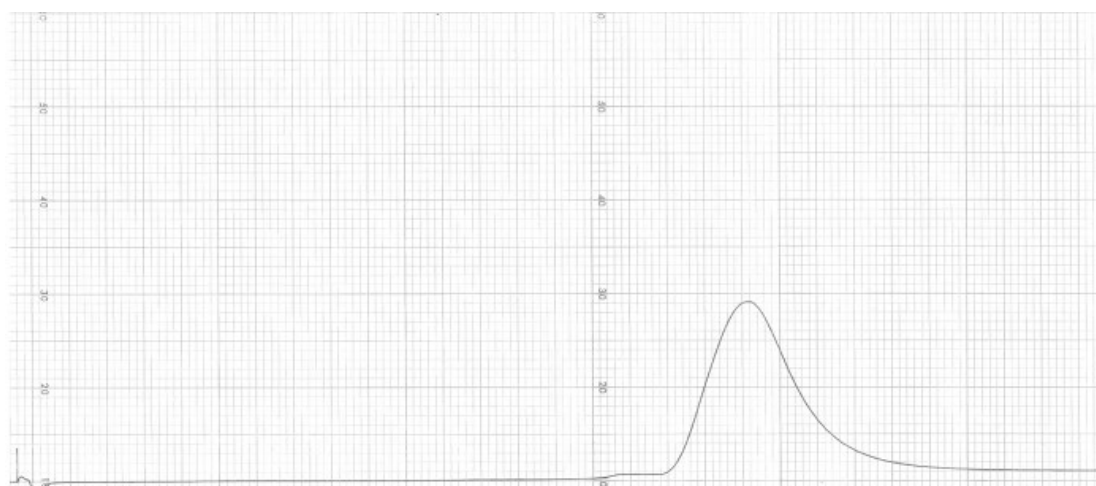

**Figure S2.** GPC chromatogram for **2b** (Table 1,  $M_w = 499,000$ ).

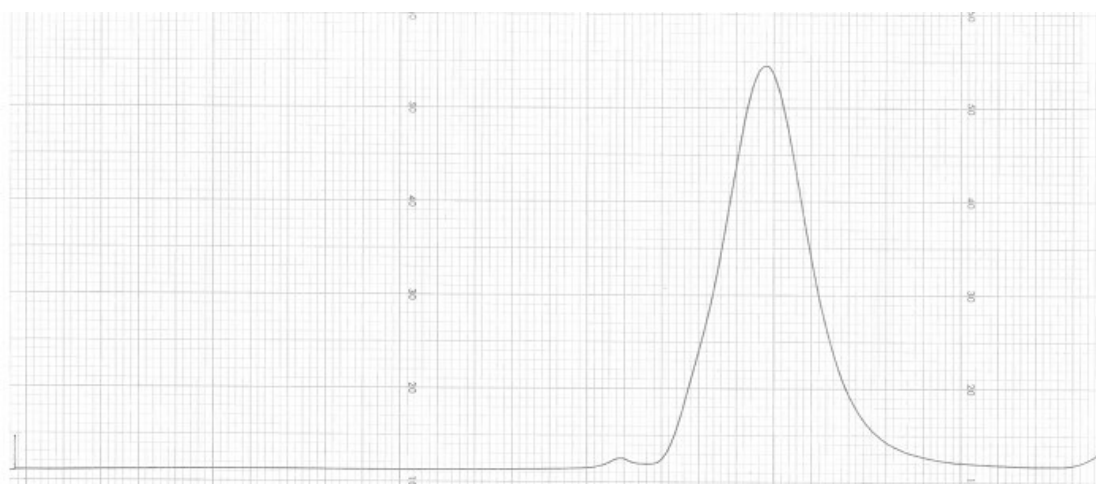

**Figure S3.** GPC chromatogram for **2c** (Table 1,  $M_w = 707,000$ ).

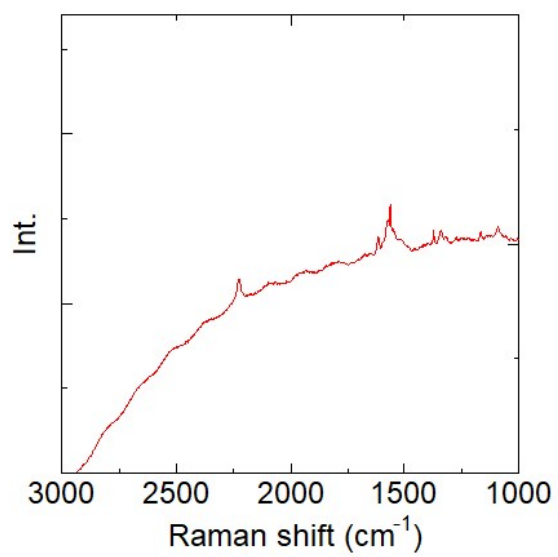

**Figure S4.** Raman spectrum for **2a**.
